# Supplementary material for: Coulomb blockade in monolayer MoS2single electron transistor
Source: Royal Society of Chemistry journal article supplement (doi:10.1039/c5nr08954a), 2016-01-01
Supplement: c5nr08954a1.pdf [file c5nr08954a1.pdf]

## Coulomb blockade in monolayer MoS<sub>2</sub> single electron transistor: Supplementary information

*Kyunghoon Lee, Girish Kulkarni, Zhaohui Zhong\**

Department of Electrical Engineering and Computer Science, University of Michigan  
Ann Arbor, MI 48109, USA

### METHODS

Monolayer and few layered MoS<sub>2</sub> were exfoliated from commercially available molybdenum disulfide crystal (SPI Supplies). The conductance of MoS<sub>2</sub> single electron transistors at 6K was measured in a cryogen-free closed cycle cryogenic probe station (CRX-4K, LakeShore).

### Optical images of exfoliated MoS<sub>2</sub> flakes

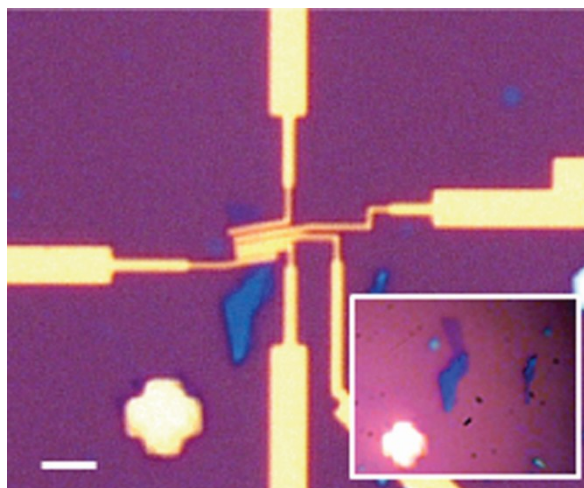

FIG. S1. Optical image of MoS<sub>2</sub> single electron transistor. (Inset) Optical image of exfoliated MoS<sub>2</sub> flakes.

### I-V characteristics of monolayer 300nm channel length MoS<sub>2</sub> device with SiO<sub>2</sub>

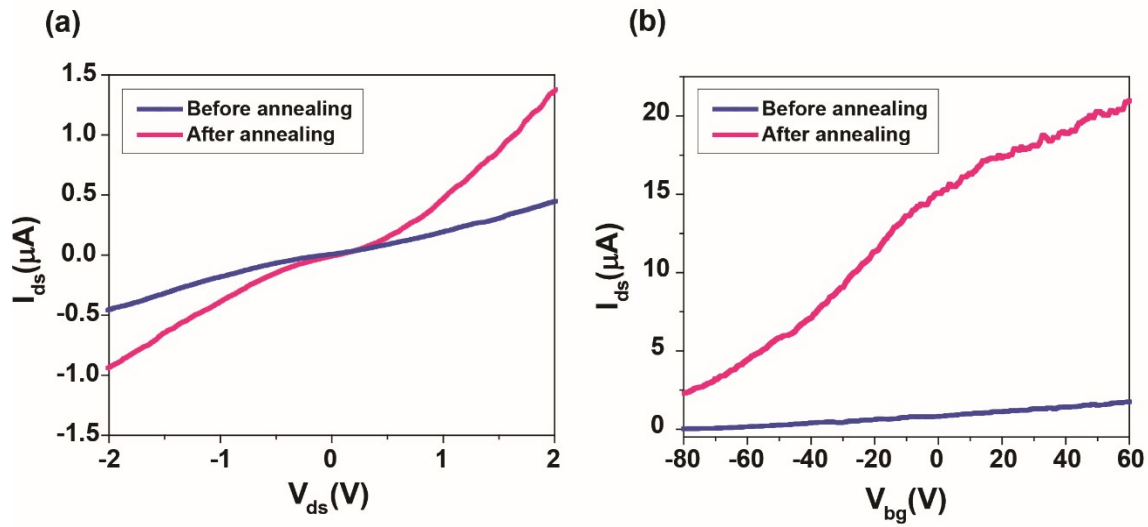

FIG. S2. (a) Room temperature  $I$ - $V$  characteristics of monolayer MoS<sub>2</sub> transistor with  $L = 300$  nm,  $W = 1.2 \mu\text{m}$ . This device was made from same monolayer MoS<sub>2</sub> flake, from which  $I$ - $V$  characteristics on 200 nm channel length device was shown in Fig. 1. (b) Transfer characteristics before and after thermal annealing process.  $V_{ds} = 10$  mV.

### I-V characteristics of monolayer MoS<sub>2</sub> device with Al<sub>2</sub>O<sub>3</sub> as the gate dielectrics

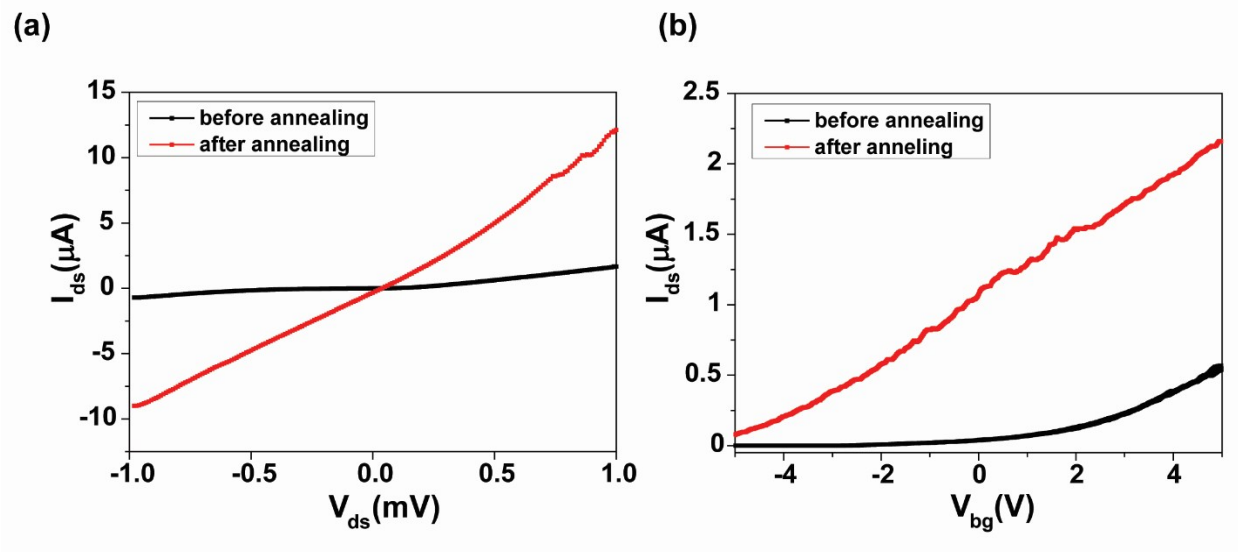

FIG. S3. (a) Room temperature  $I$ - $V$  characteristics of monolayer MoS<sub>2</sub> transistor with 70 nm Al<sub>2</sub>O<sub>3</sub> as the back-gate dielectrics. (b) Transfer characteristics before and after thermal annealing process.  $V_{ds} = 100$  mV.

## Electrostatic simulation of fringing field screening effect

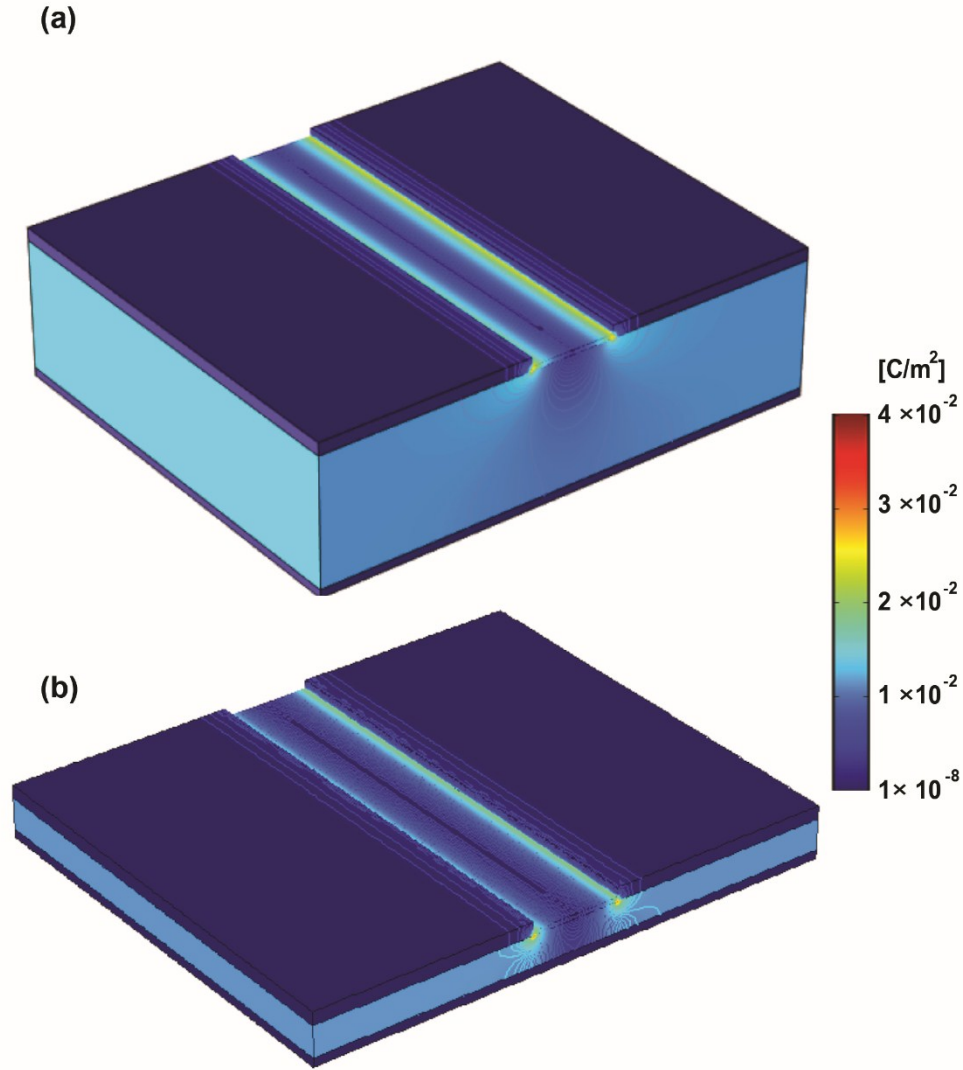

FIG. S4. The electric displacement field distribution (with contour) on the MoS<sub>2</sub> layer with (a) 280nm SiO<sub>2</sub> as a gate dielectric layer, and (b) 70nm Al<sub>2</sub>O<sub>3</sub> as a gate dielectric layer for the device geometry of  $W = 1\mu\text{m}$ ,  $L = 200\text{nm}$ . Herein, (a)  $V_{\text{bg}} = 50\text{V}$ ,  $V_{\text{ds}} = 100\text{mV}$ , (b)  $V_{\text{bg}} = 6.25\text{V}$ ,  $V_{\text{ds}} = 100\text{mV}$  in consideration of  $\epsilon_{\text{SiO}_2} = 3.9$ , and  $\epsilon_{\text{Al}_2\text{O}_3} = 7.8$ . This result indicates that only small portion of MoS<sub>2</sub> channel can contribute to the back gate capacitance due to fringing field screening effect due to contact electrodes.

## Coulomb blockade in monolayer and multilayer MoS<sub>2</sub> SET

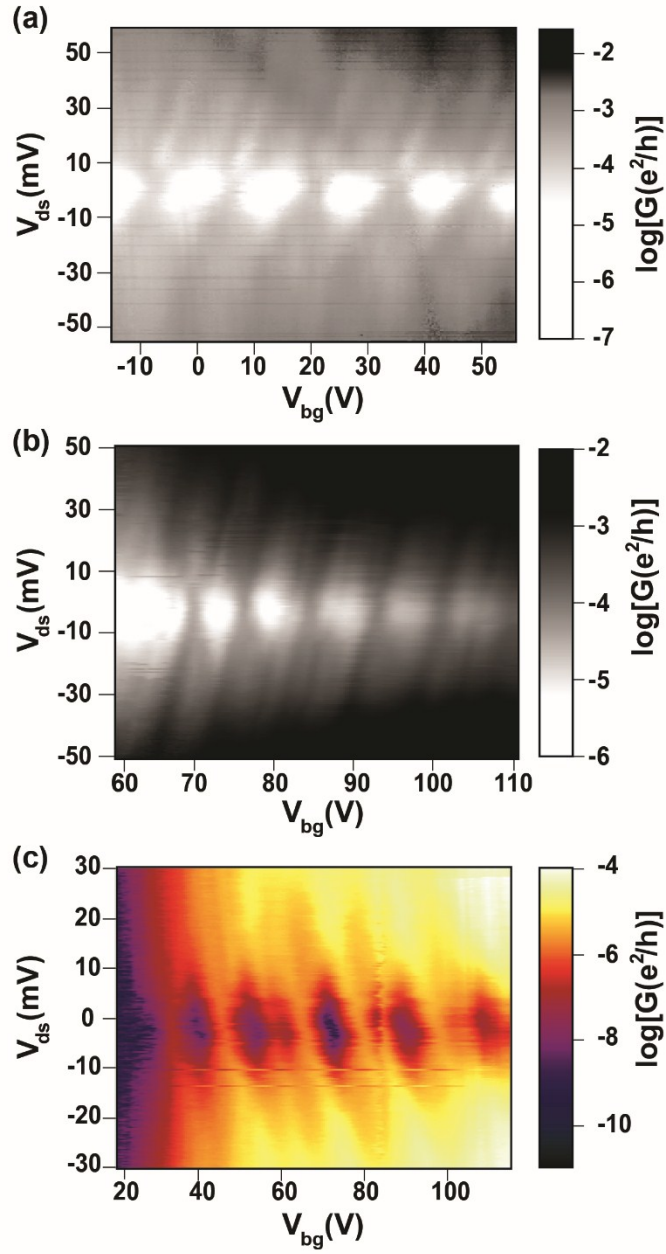

FIG. S5. The Coulomb diamonds observed in monolayer MoS<sub>2</sub> SETs from the devices with dimension of (a)  $L = 300$  nm,  $W = 1.2$   $\mu\text{m}$  (Room temperature I-V characteristics was shown in FIG. S2), and (b)  $L = 200$  nm,  $W = 1.5$   $\mu\text{m}$ . (c) The Coulomb diamonds in a multilayer MoS<sub>2</sub> (flake thickness  $\sim 4$  nm, corresponding to 5 layers) SET with  $L = 250$  nm and  $W = 700$  nm.

### Line-shape of Coulomb oscillations in the MoS<sub>2</sub> SET

There are two different temperature regimes for Coulomb blockade.

- (i)  $\Delta E \ll k_B T \ll e^2/C$ , the *classical or metallic Coulomb blockade regime*, where many excited levels are present due to thermal fluctuation.
- (ii)  $k_B T \ll \Delta E \ll e^2/C$ , *quantum Coulomb blockade regime*, where only one or a few levels are excited in transport.

The line-shape of the coulomb-blockade oscillations can be fitted to the conductance expression<sup>1</sup>:

In the quantum Coulomb blockade regime,

$$\frac{G}{G_{max}} = \cosh^{-2}\left(\frac{ea|V - V_{peak}|}{2k_B T}\right)$$

Equation B- 1

And in the classical or metallic Coulomb blockade regime.

$$\frac{G}{G_{max}} = \cosh^{-2}\left(\frac{ea|V - V_{peak}|}{2.5k_B T}\right)$$

Equation B- 2

where  $a = C_g/C_\Sigma$  is determined from the slopes of Coulomb diamonds, and  $V_{peak}$  is the back-gate voltage at resonance peak. Thus, the electron temperature in our measurements can be extracted from Coulomb blockade fits by using Equation B-2 for the classical region.

## REFERENCES

1. C. W. J. Beenakker, *Physical Review B*, 1991, **44**, 1646-1656.
